# Supplementary material for: Diagnostic of functionality of polymer membrane – based ion selective electrodes by impedance spectroscopy
Source: Royal Society of Chemistry journal article supplement (doi:10.1039/c0ay00249f), 2010-01-01
Supplement: c0ay00249f.pdf [file c0ay00249f.pdf]

## Diagnostic of functionality of polymer membrane – based ion selective electrodes by impedance spectroscopy

C0AY00249F

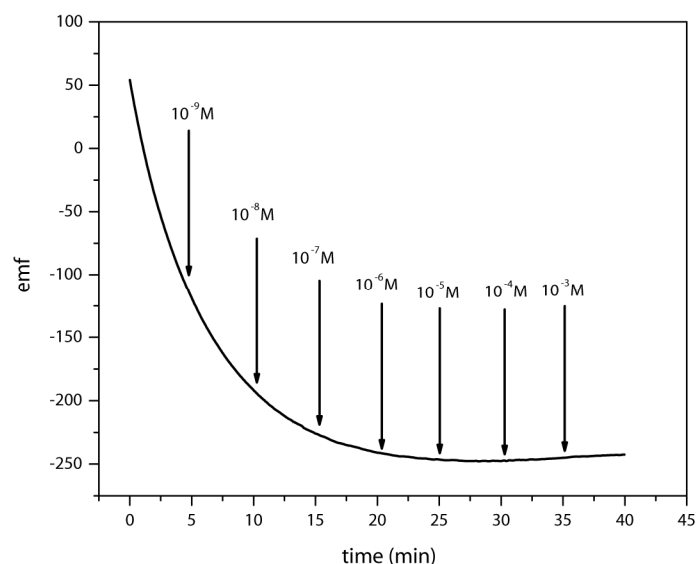

Figure S1. Response of LCISE upon inflicting a slight physical damage on the membrane. Arrows point at the addition of aliquots of standard solution to make the noted sample concentration.

### Water layer test

The electrodes were first immersed in a solution of  $10^{-3}$  M  $\text{Pb}(\text{NO}_3)_2$  and the potential was followed to stabilize for four hours. The electrodes were then transferred in  $10^{-3}$  M  $\text{NaCl}$  and the potential monitored overnight. The electrodes were then re-immersed in  $10^{-3}$  M  $\text{Pb}(\text{NO}_3)_2$  and the potential was monitored for a further four hours. It should be noted that pH of  $10^{-3}$  M  $\text{Pb}(\text{NO}_3)_2$  and  $10^{-3}$  M  $\text{NaCl}$  solutions were 4.6 and 7.2. Considering selectivity coefficients of Pb IV ionophore to  $\text{Na}^+$  and  $\text{H}^+$  of  $K_{\text{Pb.Na}}^{\text{Pot}} = -6.3$  and  $K_{\text{Pb.H}}^{\text{Pot}} = -6.3$  respectively, effect of pH of the used solutions is negligible.

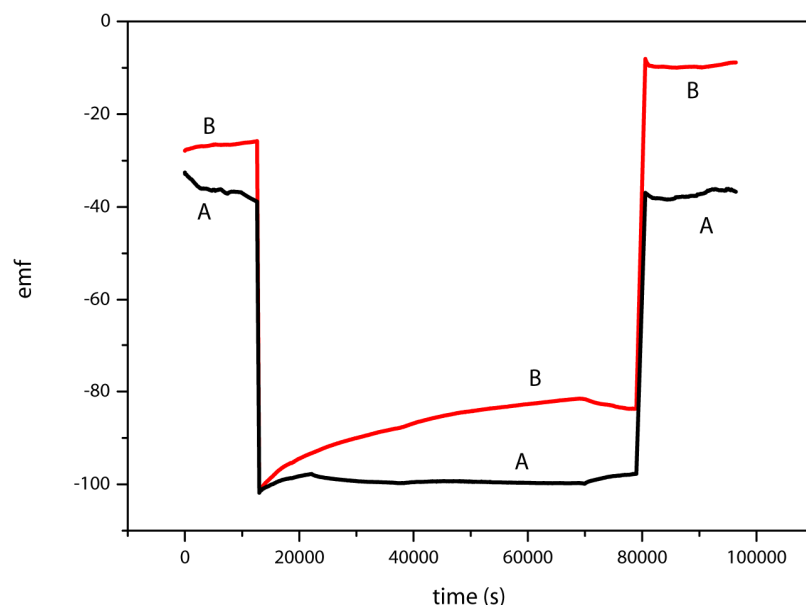

Figure S2. Responses of electrodes A (POT-based) and B (without conductive polymer) while testing for the presence of water layer between the ion-selective membrane and solid support. Strong drifts in the case of electrode B indicate the existence of the water layer.

### Calculation of theoretically expected limit of detection

Equation used for predicting limit of detection (LOD) is developed elsewhere.<sup>1</sup>

$$\log a_{\text{pb,EDL}} = \left(\frac{1}{3}\right) \log \left[ K_{\text{pb,H}}^{\text{pot}} \left( \frac{a_{\text{H}} q R_{\text{T}}}{2} \right)^2 \right] \quad (\text{SEq1})$$

Under these experimental conditions and assuming that ion fluxes originate only from ion exchange at the sample/membrane phase boundary, a detection limit of  $a_{\text{pb}} = 6.3 \times 10^{-9} \text{ M}$  was predicted, using the following values;

selectivity coefficient for protons  $\log K_{\text{pb,H}}^{\text{pot}} = -3.5$ <sup>1</sup>,  $R_{\text{T}}$  (the total amount of ionic sites in the membrane) = 0.005 mol/kg, pH = 4.0 (proton activity of  $a_{\text{H}} = 1 \times 10^{-4} \text{ M}$ ) and  $q = 0.0001$ ,  
 The parameter  $q$  is expressed as:

$$q = \frac{D_{\text{org}} \delta_{\text{aq}}}{D_{\text{aq}} \delta_{\text{org}}} \quad (\text{SEq2})$$

where  $D$  and  $d$  are the diffusion coefficients and diffusion layer thicknesses of the organic (org) and aqueous (aq) phases, respectively. The parameter  $q$  was estimated using the diffusion coefficient of lead in water ( $1.35 \times 10^{-5} \text{ cm}^2/\text{s}$ )<sup>2</sup>, the diffusion coefficient of primary ion-ionophore complex in the membrane ( $1 \times 10^{-8} \text{ cm}^2/\text{s}$ )<sup>3</sup> and a ten-fold smaller thicknesses of the aqueous compared to organic layer, which is a reasonable assumption based on a fast stirring rate<sup>4</sup>.

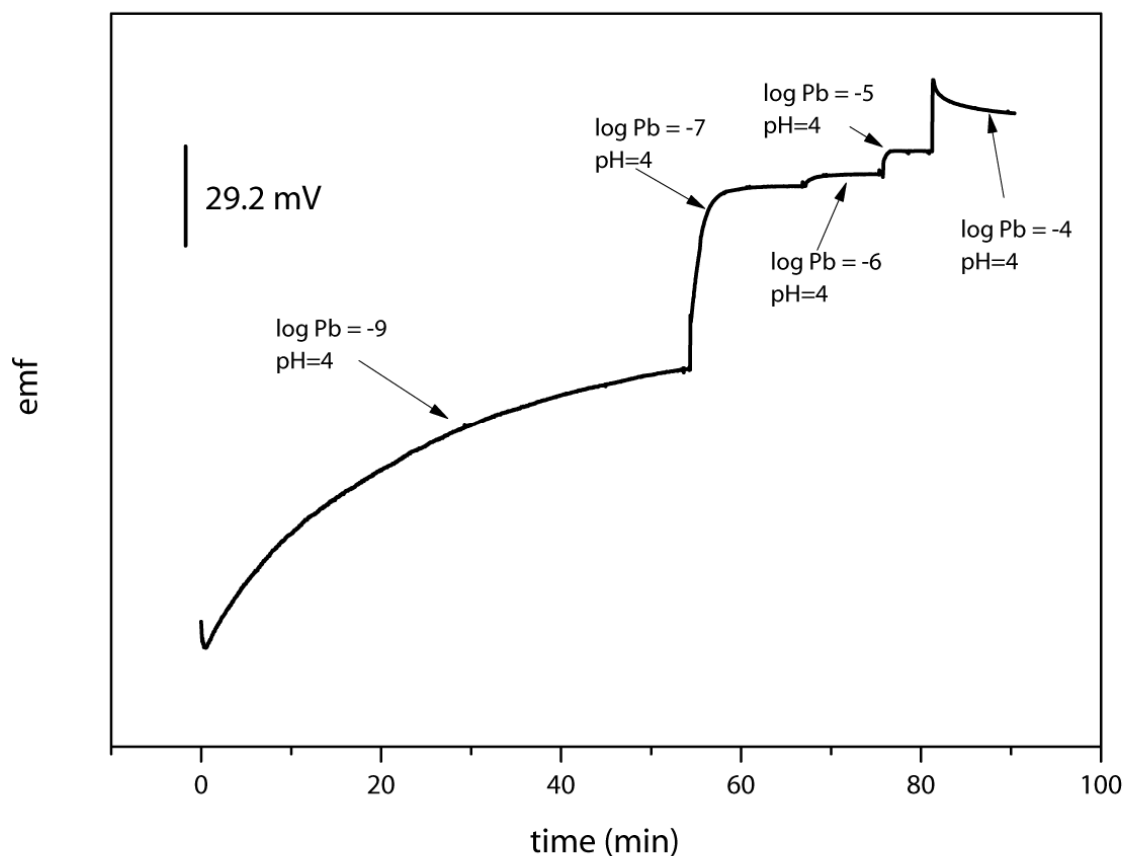

Figure S3. Time traces of Pb<sup>2+</sup>-selective electrode exposed to bacteria-rich water for four days (electrode #8 from Table 1 in main document).

## LITERATURE

- (1) Ceresa, A.; Bakker, E.; Hattendorf, B.; Gunther, D.; Pretsch, E. *Anal. Chem.* **2001**, *73*, 343-351.
- (2) Valente, A. J. M.; Ribeiro, A. C. F.; Lobo, V. M. M.; Jimenez, A. *Journal of Molecular Liquids* **2004**, *111*, 33-38.
- (3) Puntener, M.; Fibbioli, M.; Bakker, E.; Pretsch, E. *Electroanalysis* **2002**, *14*, 1329-1338.
- (4) Radu, A.; Peper, S.; Bakker, E.; Diamond, D. *Electroanalysis* **2007**, *19*, 144-154.
